1 **Risk and outcomes of healthcare-associated infections in three hospitals in Bobo Dioulasso,**  
2 **2022 (Burkina Faso): a longitudinal study**

3

4 **Authors**

5 Arsène Hema<sup>1</sup>, Satouro Arsène Some<sup>2</sup>, Odilon Kaboré<sup>3</sup>, Soufiane Sanou<sup>2</sup>, Armel Poda<sup>4,6</sup>, Ziemlé  
6 Clément Meda<sup>5,6</sup>, Abdoul Salam Ouedraogo<sup>3,6</sup>, Léon. Savadogo<sup>6</sup>

7 1. Quality Department of Sourô Sanou Teaching Hospital, Bobo-Dioulasso, Burkina Faso

8 2. Centre Muraz, National Public Health Institute, Bobo-Dioulasso, Burkina Faso

9 3. Bacteriology and virology laboratory, Bobo-Dioulasso, Burkina Faso

10 4. Infectious Diseases Department of Sourô Sanou Teaching Hospital, Bobo-Dioulasso, Burkina  
11 Faso

12 5. Information, Research and Epidemiology Department of Sourô Sanou Teaching Hospital,  
13 Bobo-Dioulasso, Burkina

14 6. National Institute of Health Sciences, Nazi Boni University, Bobo-Dioulasso, Burkina Faso

15

16

17 ***Corresponding author:***

18 **Arsène HEMA**

19 Tel: (+226) 70246117

20 Mail: [hemaarsene@yahoo.fr](mailto:hemaarsene@yahoo.fr)

21 01 BP 676 Bobo-Dioulasso 01, Burkina Faso

22

23 **Authors' contributions**

24 AH, SAS, OK and SS designed the study; AH, SAS, SS and OK drafted the manuscript. AH, SAS

25 and OK conducted the analyses. AH, SAS, SS, OK, AP, ZCM, ASO and LS contributed to the

26 interpretation of the findings and edited and reviewed the manuscript. All the authors have read

27 and approved the final manuscript.

28

## 29 **Abstract**

### 30 **Background**

31 Healthcare-associated infections (HAIs) are one of the most common adverse events in healthcare  
32 and represent a major public health problem. However, 40% to 70% of HAIs are considered to be  
33 preventable. The present study was conducted to analyze the incidence, etiological factors, and  
34 outcomes of HAIs through active surveillance in three hospitals in the city of Bobo Dioulasso.

### 35 **Methods**

36 A prospective, longitudinal, multicenter study was conducted from May 1<sup>th</sup> to November 30<sup>rd</sup>,  
37 2022, in two district hospitals (DO and Dafra) and the Sourô Sanou Teaching Hospital (CHUSS).  
38 Consenting patients hospitalized for reasons other than infection, cancer, immunosuppression in  
39 the postoperative care ward of DO or of Dafra district hospitals, intensive care unit (ICU)/CHUSS,  
40 neonatal ward/CHUSS, and gynecology and obstetrics postoperative care ward/CHUSS during a  
41 2-month inclusion period in district hospitals and 4 months for CHUSS wards. For this study, we  
42 used the operational definitions of the French Technical Committee for Nosocomial Infections and  
43 Healthcare-associated Infections, with slight modifications. Logistic regression was used to  
44 analyze predictors of HAIs.

### 45 **Results.**

46 Of the 664 patients enrolled, 166 experienced an HAI, with a cumulative incidence rate of 25%  
47 (CI: 21.7%-28.3%) or an incidence density rate of 36.7 per 1000 patient-days (CI: 31.7-42.9).  
48 Surgical site infections (SSI) (44%), followed by neonatal infections (42%) were the most common  
49 HAIs. Enterobacteriaceae represented 60% of the bacteria identified in HAIs, and 38.9% of them  
50 were extended spectrum  $\beta$ -lactamase (EBLSE) producers. Factors associated with HAIs were  
51 admission in the neonatal ward (aOR=7.4; CI:1.3-42.7), ICU (aOR=3.7; CI:1.4-9.5), hospital stay  
52 longer than 2 days (aOR=2.1; CI:1.2-3.4), or male sex (aOR=1.8; CI:1.1-3.1). In addition, HAIs

53 were associated with longer follow-up, hospitalization, and mortality (18.1%; 95% CI:12.1 - 24.4).  
54 Deaths were only recorded in the ICU and neonatal ward, with case fatality rates of 45.4% (95%  
55 CI: 27.5 - 63.4) and 21.4% (95% CI: 11.6 - 31.3), respectively, p=0.019.

## 56 **Conclusions**

57 The incidence of HAIs was relatively high in the three hospitals in Bobo Dioulasso. A national  
58 strategy to reduce HAIs should be implemented to achieve better control of HAIs.

59  
60 **Keywords:** longitudinal study, Burkina Faso, multicentre, healthcare-associated infection,  
61 outcomes

62

## 63 **Introduction**

64 Healthcare-associated infections (HAIs) are one of the most common adverse events in healthcare  
65 and a major public health problem in both developed and resource-limited countries [1]. HAIs are  
66 associated with increased healthcare costs, prolonged hospital stays, functional disability, and  
67 patient death [1,2]. Most HAIs are caused by bacteria, viruses or microscopic fungi that become  
68 multi-resistant due to inappropriate use of antimicrobials. Thus, multi-resistant microorganisms  
69 cause infections with limited therapeutic options, leading to longer hospital stays and higher  
70 mortality rates compared to HAIs caused by susceptible bacteria of the same species [2-5].  
71 Therefore, the fight against HAIs is inextricably linked to the fight against antimicrobial resistance  
72 [1,6]. Many factors promote HAIs, including healthcare systems and procedures, human behavior  
73 influenced by education, socioeconomic constraints, and often societal norms and beliefs.  
74 However, 40% to 70% of HAIs are considered preventable through adherence to hospital hygiene  
75 measures [7,8].

76 According to the World Health Organization (WHO), HAIs affect 1.4 million people worldwide at  
77 any given time, with 3.5% to 12% in developed countries (9% in the United Kingdom, 4.4% in  
78 France, and 6.9% in Belgium) compared to 25% in low- and middle-income countries [1,2]. In  
79 Africa, hospital-wide prevalence of HAIs varied from 6.7% to 18.7%, with a high prevalence that  
80 can exceed 50% in ICUs [9-13]. Most of these studies are prevalence studies, which have the  
81 advantage of being easy and quick to conduct, but the disadvantage of low precision and lack of  
82 information on the outcomes of HAIs [14].

83 In Burkina Faso, data on the incidence of HAIs are scarce due to the lack of an HAI surveillance  
84 system [15, 16]. In addition, hospital overcrowding, limited resources, structural and logistical  
85 challenges, combined with inadequate training of professionals in hospital hygiene, antimicrobial  
86 resistance and their inadequate monitoring, suggest a high risk of HAIs. The present study aims to

87 analyze the extent, etiologic factors and outcomes of associated infections through active  
88 surveillance in three hospitals the city of Bobo Dioulasso.

89

## 90 **Methods**

### 91 *Study design and location:*

92 This prospective, longitudinal, multicenter study was conducted from May 1<sup>th</sup> to November 30<sup>th</sup>,  
93 2022, in 3 health care facilities in Bobo-Dioulasso, the second largest city in Burkina Faso. The  
94 facilities included two (02) district hospitals (DO and Dafra) and one (01) teaching hospital (Sourô  
95 Sanou Teaching Hospital (CHUSS) in Bobo-Dioulasso. In the district hospitals, the study was  
96 conducted in the postoperative care wards. In the Sourô Sanou teaching hospital, the study was  
97 conducted in the intensive care unit, the gynecology and obstetrics postoperative care ward and the  
98 neonatal ward.

#### 99 ➤ *Postoperative care ward of Dafra district hospital*

100 The post-operative ward of Dafra District Hospital received 888 post-operative patients in 2022.  
101 This ward consists of two (02) inpatient rooms with a total capacity of 16 beds. During the survey,  
102 the service was staffed by 52 nurses, two (02) hospital hygiene technicians, and two permanent  
103 physicians.

#### 104 ➤ *Postoperative care ward of Do district hospital*

105 The postoperative ward of Do District Hospital received 1706 postoperative patients in 2022. This  
106 ward consists of six inpatient rooms, with a total capacity of 24 beds. At the time of the survey, the  
107 service was staffed by 59 nurses, 1 hospital hygiene technician, five (05) permanent physicians,  
108 and approximately five (05) medical trainees.

#### 109 ➤ *Intensive Care Units of Sourô Sanou Teaching Hospital (ICU)*

110 It is the reference center for intensive care of four health regions out of 13 of Burkina Faso. In  
111 2022, 525 patients were admitted to the intensive care unit of Sourô Sanou Teaching Hospital. This  
112 unit has 14 inpatient beds. The service is staffed by five (05) Physicians Anaesthetist resuscitators,  
113 approximately 10 physicians' residents, 23 nurses and three (03) hospital hygiene technicians

114 ➤ ***Neonatal ward of Sourô Sanou Teaching Hospital***

115 It was the only neonatal ward in western Burkina Faso and a reference center for neonatal care of  
116 four health regions. In 2022, the neonatal ward of Sourô Sanou Teaching Hospital received 2,765  
117 new-borns. It has a hospital room that includes 6 incubators and 34 cradles. The staff consists of 2  
118 doctors specializing in pediatrics, 2 general practitioners, approximately 10 resident physicians, 28  
119 nurses and 3 hospital hygiene technicians.

120 ➤ ***Gynecology and Obstetrics postoperative care ward of Sourô Sanou Teaching Hospital***

121 In 2022, the gynecology and obstetrics postoperative care ward of Sourô Sanou Teaching Hospital  
122 received 1,946 women, including 1,433 cesareans. This unit has 30 inpatient beds. The staff  
123 consisted of 16 physicians, four (04) nurses and 21 midwives.

124 ***Study population***

125 The population of this study consisted of the cohort of all patients admitted to the neonatal ward,  
126 ICU or the gynecology and obstetrics postoperative care ward of Sourô Sanou Teaching Hospital,  
127 as well as the postoperative care ward of Do District Hospital and of Dafra District Hospital during  
128 the period of active HAI surveillance.

129 ***Inclusion criteria***

130 Were included in this study, patients meeting the following conditions:

131 - Admitted to the postoperative care ward of Do or Dafra District Hospital, from May 1<sup>th</sup> to June  
132 30<sup>rd</sup>, 2022 or

- 133 - Admitted to ICU or neonatal ward of Sourô Sanou Teaching Hospital, from May 14<sup>th</sup> to August  
134 14<sup>th</sup>, 2022, or  
135 - Admitted to the gynecology and obstetrics postoperative care ward of Sourô Sanou Teaching  
136 Hospital, from August 1<sup>th</sup> to November 30<sup>rd</sup>, 2022  
137 - and have given their consent

### 138 *Non-inclusion criteria*

139 Patients were not included in this study if they met any of the following criteria:

- 140 - Patients who have been hospitalized for less than 48 hours,  
141 - Had a primary diagnosis of sepsis, cancer, infection, or immunocompromised state.

### 142 *Surveillance and data collection*

143 Based on data from a previous prevalence study [16], we targeted 4 infections to monitor for this  
144 study: urinary infections, systemic infections, surgical site infections (SSI) and neonatal infections.  
145 A team composed of an epidemiologist, two clinical doctors and three nursing managers was  
146 responsible for active data collection in collaboration with the care unit supervisor. Data were  
147 collected from patient records, bandage records, hospitalization records and patient interviews.  
148 Case identification was active. For this purpose, the data collection team examined hospitalization  
149 registers three times a week to identify eligible patients. Information collected from these sources  
150 was supplemented by information from patients and nursing staff and recorded on individual data  
151 collection sheets which included, among others: sociodemographic data (age, sex, origin,  
152 profession), factors risk related to care, initial or curative antibiotic therapy, HAI type, pathogen in  
153 question, development. Surgical patients included were followed until the surgical wound healed,  
154 even after discharge from the hospital. The condition of the surgical wounds was monitored during  
155 outpatient bandage visits. Non-operated patients were followed until they left the hospital. In all  
156 cases, patient follow-up did not exceed 30 days. In the event of HAI, biological samples when

157 possible were taken when possible, depending on the type of suspected infection (blood, pus, urine)  
158 and a bacteriological analysis were performed in the CHUSS laboratory.

159

### 160 ***Definition of outcome variables***

161 The primary outcome variable was occurrence of infection after 48 h of hospitalization in a patient  
162 with no symptomatic or incubating infection at the time hospital admission. For this study, we used  
163 the operational definitions of the French Technical Committee for Nosocomial Infections and  
164 Healthcare-Related Infections (CTINILS) [17], with slight modification. This committee largely  
165 adopts the definitions of the Center of Disease Control and prevention (CDC).

### 166 ***Variables***

#### 167 ***Outcome variables***

168 Outcome variables were HAI and its subsequent outcome. HAI was defined by the presence of at  
169 least one of the infections targeted by surveillance during this study (SSI, urinary tract infection,  
170 systemic infection, neonatal infection). For the analysis, we coded: 0 for no HAI and 1 for presence  
171 of HAI. HAIs outcomes were categorized by recoveries, deaths, discharges against medical advice  
172 and lost to follow-up.

#### 173 ***Predictor variables***

- 174 - Age: categorized into four groups: 0-14 years, 15-35 years, 36-50 years, and >50 years.
- 175 - Gender: female and male
- 176 - Residence: the patient's place of residence, categorized as urban or rural
- 177 - Exposure: Surgery, urinary catheter, peripheral venous catheter, length of stay in hospital  
178 before inclusion in the study (in days)
- 179 - Ward/Unit: these are the wards/units from which patients were recruited. There were three  
180 Wards/Units of Sourô Sanou teaching Hospital (ICU/CHUSS, Neonatology/CHUSS Gyn &



181 Ob/CHUSS), one ward of the district hospital of Dafra (Surgical /Dafra) and one of the district  
182 hospital of DO (Surgical /Do).

183 - Follow-up duration: period between inclusion in the study and HAIs outcome occurrence. The  
184 duration of follow-up does not exceed 30 days

185 - Length of stay before inclusion the time spent in hospitalization and inclusion in the study in  
186 days

### 187 ***Statistical analysis***

188 Data collected on survey forms were entered into Epidata<sup>®</sup> software and analyzed using Stata<sup>®</sup>  
189 software version 13. Patient characteristics, HAI exposure, and distribution of patients by ward  
190 were described. Incidence rates with their 95% confidence intervals (CI), type, antimicrobial use  
191 and HAI outcomes were described by patient characteristics, HAI exposure and ward/unit.  
192 Qualitative variables were described by their percentages and the quantitative variables by their  
193 mean (me) and their standard deviation (SD). Proportions were compared using Pearson's chi2 test  
194 or Fisher's exact test when appropriate. Means were compared using Student's t-test. Logistic  
195 regression (univariate and multivariate) was used to identify the risk factor for HAI. Patient  
196 characteristics, HAI exposures and ward/unit that were significantly associated with HAI at the  
197 20% univariate threshold were retained in the multivariate models. The significance threshold for  
198 all tests was set at a value of  $p < 5\%$ .

### 199 ***Ethical aspects***

200 This study was conducted as part of the "Surveillance and prevention strategies for healthcare  
201 associated infections in Bobo-Dioulasso, Burkina Faso" study approved by the National Ethics  
202 Committee of Burkina Faso. Signed informed consent was obtained from the participants and an  
203 information sheet was given to each participant. We obtained informed consent, written and signed

204 from parents or guardians for minors. The data collected were anonymized to ensure  
 205 confidentiality.

206

## 207 **Results**

### 208 **3.1. Description of the study population**

209 A total of 664 patients were included with 471 (70.9%) at the Sourô Sanou Teaching Hospital, 85  
 210 (12.8%) at the CMA of Dafra and 108 (16.3%) at the CMA of DO. The study population was  
 211 mainly female (80.1%) with a mean age of the study population of 21.6 years (SD: 14.3). Neonates  
 212 (less than 1 month) represented 25% of our study population. Our patients mainly lived in urban  
 213 areas (88.7%). Regarding exposure, 69.9% of them had undergone surgery, 47.1% had a urinary  
 214 catheter and 50.0% had a venous catheter (Table 1), and the mean length of hospital stay before  
 215 inclusion was 2.2 days (SD: 0.4). The majority (34.9%) of the included patients were admitted to  
 216 the gynecology and obstetrics postoperative ward of the CHUSS.

217

218 **Table 1:** Characteristics of patients, multicenter longitudinal survey, Bobo-Dioulasso 2022

|                                        | All patients<br>n(%) | Patients with<br>HAI<br>n(%) | Patients<br>without HAI<br>n(%) | p-<br>value |
|----------------------------------------|----------------------|------------------------------|---------------------------------|-------------|
| <b>All patients</b>                    | 664 (100)            | 166 (100)                    | 498 (100)                       |             |
| <b>Patient characteristics</b>         |                      |                              |                                 |             |
| <b>Ages group (years)</b>              |                      |                              |                                 | 0.000       |
| • 0-14                                 | 179 (27.0)           | 73 (44.0)                    | 106 (21.3)                      |             |
| • 15-35                                | 404 (60.8)           | 72 (43.4)                    | 332 (66.7)                      |             |
| • 36-50                                | 65 (9.8)             | 14 (8.4)                     | 51 (10.2)                       |             |
| • >50                                  | 16 (2.4)             | 7 (4.2)                      | 9 (1.8)                         |             |
| <b>Sex</b>                             |                      |                              |                                 | 0.000       |
| • Male                                 | 132 (19.9)           | 64 (38.6)                    | 68 (13.7)                       |             |
| • Female                               | 532 (80.1)           | 102 (61.4)                   | 430 (86.3)                      |             |
| <b>Residence</b>                       |                      |                              |                                 | 0.395       |
| • urban                                | 589 (88.7)           | 144 (86.8)                   | 445 (89.4)                      |             |
| • Rural                                | 75 (11.3)            | 22 (13.2)                    | 53 (10.6)                       |             |
| <b>Exposure</b>                        |                      |                              |                                 |             |
| • Surgery                              | 464 (69.9)           | 84 (50.6)                    | 380 (76.3)                      | 0.000       |
| • Urinary catheter                     | 313 (47.1)           | 69 (41.6)                    | 244 (49.0)                      | 0.106       |
| • Peripheral venous catheter           | 332 (50.0)           | 73 (44.0)                    | 259 (52.0)                      | 0.088       |
| • Length stay before inclusion >2 days | 140 (21.1)           | 43 (25.9)                    | 97 (19.5)                       | 0.099       |

| Ward/Unit                                   |            |           |            | 0.000 |
|---------------------------------------------|------------|-----------|------------|-------|
| • postoperative care ward /Dafra            | 85 (12.8)  | 15 (9.0)  | 70 (14.1)  |       |
| • postoperative care ward /Do               | 108 (16.3) | 13 (7.8)  | 95 (19.1)  |       |
| • Gyn & obst postoperative care ward /CHUSS | 232 (34.9) | 35 (21.1) | 197 (39.5) |       |
| • Neonatal ward /CHUSS                      | 166 (25.0) | 70 (42.2) | 96 (19.3)  |       |
| • ICU/CHUSS                                 | 73 (11.0)  | 33 (19.9) | 40 (8.0)   |       |

219 Gyn & obst = Gynecology & obstetric; ICU= Intensive care unit

220

### 221 **3.2. Healthcare-associated incidence**

222 Of the 664 patients followed, 166 had at least one HAI, resulting in a cumulative incidence rate of  
 223 25% (CI: 21.7%-28.3%) or an incidence density rate of 36.7 per 1000 patient-days (CI: 31.7-42.9).

224 The mean time of the occurrence of these infections was 5 days (SD: 3.5). The highest incidences  
 225 of HAI were observed in ICU (45.2%; CI: 33.5-56.9%) and the neonatal ward (42.2%; CI: 34.6-  
 226 49.7%) (Table 2).

227

228 **Table 2:** Incidence of healthcare-associated infection by ward specialty, multicenter longitudinal  
 229 survey, Bobo-Dioulasso, 2022

| Ward/Unit                                 | Cumulative incidence rate<br>%(95%CI) | Incidence density rate<br>‰ patient-days (95%CI) |
|-------------------------------------------|---------------------------------------|--------------------------------------------------|
| All ward/Unit                             | 25 (21.7%-28.3)                       | 36.7 ( 31.7- 42.9)                               |
| Postoperative care ward /Dafra            | 17.6 (9.4 – 25.9)                     | 13.0 (7.9 – 21.6)                                |
| Postoperative care ward /Do               | 12.0 (5.8 – 18.3)                     | 9.8 (5.7 – 16.8)                                 |
| Gyn & obst postoperative care ward /CHUSS | 15.1 (10.4 – 19.7)                    | 35.2 (25.2 – 49.0)                               |
| Neonatal ward/CHUSS                       | 42.2 (34.6 – 49.7)                    | 105.6 (83.5 – 133.4)                             |
| ICU/CHUSS                                 | 45.2 (33.5 – 56.9)                    | 84.6 (60.2 – 119.1)                              |
| P-value                                   | 0.000                                 | 0.000                                            |

230 Gyn & obst = Gynecology & obstetric; ICU= Intensive care unit

231

232

### 233 **Typology of HAIs**

234 Of the 166 HAIs, surgical site infections (SSIs) were the most common, accounting for 44.6%  
235 (74/166) of all HAIs and occurring in 16.0% of patients who underwent surgery (74/464). After  
236 SSIs, the next most common infections were neonatal infections, which accounted for 42.2%  
237 (70/166) of HAIs (Figure 1).

238  
239 **Figure1: Distribution of healthcare-associated infection(n=166), multicenter longitudinal**  
240 **survey, Bobo-Dioulasso 2022**

### 242 **3.3. Bacteriological profile of healthcare-associated infections**

243 A total of 47 microorganisms were identified in 79 samples taken from 166 HAIs. The most  
244 common microorganisms found among the 45 were *Escherichia coli* (31.9%), *Klebsiella*  
245 *pneumoniae* (17%), *Acinetobacter baumannii* (12.8%), *Pseudomonas aeruginosa* (8.5%),  
246 *Staphylococcus epidermidis* (8.5%), *Staphylococcus aureus* (6.4%), *Enterococcus sp* (4.3%),  
247 *Klebsiella oxytoca* (4.3%), *Pantoea spp1* (2.1%). Figure 2 summarizes the distribution of different  
248 groups of microorganisms. Resistances to 3<sup>rd</sup> generation cephalosporins, amoxicillin/clavulanate  
249 and amoxicillin were 51.8% (14/27), 69.2% (18/26) and 100% (13/13), respectively. The  
250 frequencies of resistance to cephalosporins and amoxicillin/clavulanate were highest in the  
251 neonatal ward (100% & 100%) and the ICU (66.7% & 100%). The proportion of extended-  
252 spectrum beta-lactamase producing Enterobacteriaceae (ESBLE) was 38.9% (7/28). They were  
253 isolated in the neonatal ward (n=2), in the ICU (n=3) and in the postoperative ward of Dafra (n=2).  
254 Of three (03) *Staphylococcus aureus* identified, one (01) was methicillin resistant (ICU) 33.3%.

255  
256  
257 **Figure 2: Groups of microorganisms (n=47), multicenter longitudinal survey, Bobo-**  
258 **Dioulasso 2022**

### 260 **3.4. Factors associated with HAI risk**

261 After multivariate analysis, only hospital stay of more than 2 days before enrollment (aOR=2.0;  
 262 CI: 1.2-3.3), male sex (aOR=1.8; CI: 1.1-3.0), admission in neonatal ward (aOR=6.6; CI: 1.1-40.2)  
 263 or ICU (aOR=3.3; CI: 1.3-8.5) were factors associated with a higher risk of HAI. There was no  
 264 association between age group and HAIs (Table 3).

265  
 266 **Table 3:** Healthcare-associated infection risk factor, multicenter longitudinal survey, Bobo-  
 267 Dioulasso, 2022

| Variables                                   | cOR [95%CI]   | p-value* | aOR [95%CI]   | p-value*     |
|---------------------------------------------|---------------|----------|---------------|--------------|
| <b>Ages group (years)</b>                   |               | 0.000    |               | 0.690        |
| • 0-14                                      | 1             |          | 1             |              |
| • 15-35                                     | 0.3 [0.2-0.5] |          | 1.9 [0.6-6.5] |              |
| • 36-50                                     | 0.4 [0.2-0.8] |          | 1.7 [0.5-6.3] |              |
| • >50                                       | 1.1 [0.4-3.2] |          | 1.3 [0.3-6.0] |              |
| <b>Gender</b>                               |               | 0.000    |               |              |
| • Female                                    | 1             |          | 1             | <b>0.036</b> |
| • Male                                      | 4.0 [2.6-5.9] |          | 1.8 [1.1-3.0] |              |
| <b>Residence</b>                            |               | 0.358    |               |              |
| • Urban                                     | 1             |          |               |              |
| • Rural                                     | 1.3 [0.8-2.2] |          |               |              |
| <b>Exposure</b>                             |               |          |               |              |
| • Surgery                                   | 0.3 [0.2-0.5] | 0.000    | 1.4 [0.5-3.6] | 0.473        |
| • Urinary catheter                          | 0.7 [0.5-1.1] | 0.097    | 1.2 [0.5-2.6] | 0.706        |
| • Peripheral venous catheter                | 0.7 [0.5-1.0] | 0.074    | 0.9 [0.3-2.1] | 0.763        |
| • Length stay before inclusion >2 days      | 1.4 [0.1-2.2] | 0.080    | 2.0 [1.2-3.3] | <b>0.006</b> |
| <b>Ward/Unit</b>                            |               | 0.000    |               | <b>0.003</b> |
| • Postoperative care ward /Dafra            | 1             |          | 1             |              |
| • Postoperative care ward /Do               | 0.6 [0.3-1.4] |          | 0.7 [0.2-2.1] |              |
| • Gyn & obst postoperative care ward /CHUSS | 0.8 [0.4-1.6] |          | 0.6 [0.3-1.3] |              |

---

|                        |               |                |
|------------------------|---------------|----------------|
| • Neonatal ward /CHUSS | 3.4 [1.8-6.4] | 6.6 [1.1-40.2] |
| • ICU/CHUSS            | 3.8 [1.9-7.9] | 3.3 [1.3-8.5]  |

---

268 Gyn & obst = Gynecology & obstetric; ICU= Intensive care unit, p-value\*= global p-value

269

### 270 **3.5. HAI Outcomes**

271 The mean follow-up duration of included patients was 9.4 days (SD: 9.2) with a range of 2 to 30  
272 days. It was twice as long for HAIs (15.7 days vs 7.3 days; p=0.000). The mean length of hospital  
273 stay was 7.8 days (SD: 7.9). It was longer for HAI cases (8.9 days vs 7.4 days; p=0.039). Of the  
274 664 patients included, we observed 569 recoveries (85.7%), 6 discharges against medical advice  
275 (0.9%), 62 deaths (9.3%), and 27 lost to follow-up (4.1%). Deaths were observed only in the  
276 neonatal ward (n=42) and ICU (n=20). The incidence of death was higher in patients with HAI  
277 (18.1%; CI:12.1 - 24.4) than in patients without HAI (6.4%; CI: 4.3 - 8.5) p = 0.000. HAI mortality  
278 was 45.4% (CI: 27.5 - 63.4) in the ICU and 21.4% HAI mortality (CI: 11.6 - 31.3) in the neonatal  
279 ward (p=0.019).

280

## 281 **Discussion**

282 Our study reported a cumulative incidence rate of HAIs of 25% (CI: 21.7%-28.3%) or an incidence  
283 density rate of 36.7 per 1000 patient-days (CI: 31.7-4.3). The highest incidences of HAIs were  
284 observed in the ICU (45.2%; CI: 33.5-56.9%) and in the neonatal ward (42.2%; CI: 34.6-49.7%).  
285 We observed a low efficiency of bacteriological investigations (47/79). Enterobacteriaceae  
286 accounted for 60% of the bacteria identified in HAIs, and 38.9% of these were extended-spectrum  
287 beta-lactamase (ESBL) producers. Factors associated with HAIs were hospital stay longer than 2  
288 days (aOR=2.0; CI:1.2-3.3), male sex (aOR=1.8; CI:1.1-3.0), admission to the neonatal ward  
289 (aOR=6.6; CI:1.1-40.2) or ICU (aOR=3.3; CI:1.3-8.5). HAIs were associated with increased length

290 of follow-up, hospitalization, and mortality (18.1%; 95%CI:12.1 - 24.4). HAI mortality was higher  
291 in the ICU (45.4%; CI: 27.5 - 63.4) than in the neonatal ward (21.4%; CI: 11.6 - 31.3) p=0.019.

292 The data from this study showing a high incidence of HAIs in the three main hospitals in Bobo  
293 Dioulasso are similar to those reported in previous studies in the African literature [12,18-21]. The  
294 frequency of HAIs obtained in our study remains higher than those reported in studies from both  
295 developed countries [2,22,23] and other African studies [10,11,16,24,25]. Consistent with our  
296 studies, the highest incidences of HAIs were reported in ICU and neonatal ward [12,18]. The  
297 frequencies of healthcare-associated infections vary greatly from one country to another. Then, in  
298 the same country from one hospital to another and vary from one department to another in the same  
299 hospital depending on the context. These frequencies may differ from one study to another  
300 depending on the case definitions and methodology used. It is recognized that longitudinal or  
301 incidence studies such as the present one offer greater precision in assessing the extent of these  
302 infections [14]. However, these studies are time-consuming and require more resources than the  
303 prevalence studies which are more commonly conducted. The lack of infection control policies and  
304 trained personnel and the overcrowding of our hospitals may explain the high incidence of HAIs  
305 in our study.

306 Microbiological tests were available for only 79 of the 166 infected patients (47.6%), and of these,  
307 at least one pathogen was identified in 47 (59.5%). This rate is consistent with that reported in the  
308 literature (41-86%) [26], but remains much higher than that reported by Ezzi et al. in Tunisia [27].  
309 Systematic empirical antibiotic therapy, whether prophylactic or curative, sometimes prior to  
310 bacterial culture, a common practice in the neonatal ward, could explain the poor performance of  
311 culture in our study. However, the predominance of enterobacteria in HAIs has been widely  
312 reported in the literature [5,6,19,28,29] and was confirmed in our study. In addition, this study

313 highlighted a relatively high prevalence of EBLSE 38.9%, which is consistent with data from the  
314 literature [5,6,28]. These findings suggest the need to rationalize the use of antibiotics in our  
315 hospitals by establishing therapeutic protocols based on antimicrobial resistance surveillance data.  
316 The risk factors for HAI in our study are consistent with the results of numerous studies showing  
317 an association between length of hospital stay, male sex, neonatal or ICU admission and the  
318 occurrence of these infections [10,18,30]. Long hospital stays mean prolonged exposure to  
319 pathogens in the hospital environment, as well as an increased likelihood of invasive medical  
320 procedures, resulting in a higher risk of HAI. The association of male sex with an increased risk of  
321 HAIs is a controversial topic. However, differences between men and women in terms of personal  
322 hygiene practices, of comorbidities frequency and anatomy may explain this association  
323 [32,33,34]. Patients admitted to neonatal and ICU are often vulnerable due to their compromised  
324 immune system. In addition, the high number of critically ill patients and the complex medical  
325 procedures performed in these units make them a breeding ground for pathogens.

326 Our study, like many others, shows an association between HAIs and increased length of hospital  
327 stay, comorbidity and high mortality [2]. Our results show an overall HAI mortality of 18.1%  
328 (95%CI: 12.1 - 24.4), which is lower than the 28.7% reported by Latifa Merzougui et al. in Tunisia  
329 [19]. Our case fatality rate of 45.4% (95% CI:27.5 - 63.4) in ICU HAIs is similar to the case fatality  
330 rate of Latifa Merzougui et al (44.7%) [19] and that of Shahnaz Rimaz in the Islamic Republic of  
331 Iran (45.2%) [29]. Data on HAI outcomes vary according to study methodology, accuracy of HAI  
332 case identification strategy, the typology of HAIs studied, and the quality of care. Prospective,  
333 longitudinal studies such as ours are more appropriate than retrospective studies for assessing HAI  
334 outcomes.

335 The main limitation of this study was its relatively short inclusion period (2 to 4 months), which  
336 does not allow analysis of seasonal variations in the incidence of HAIs. In addition, the present



337 study does not take into account environmental and behavioral factors of healthcare workers in the  
338 analysis of risk factors of HAIs. However, its prospective longitudinal design has the advantage of  
339 allowing the analysis of the etiological factors of HAIs.

#### 340 **Conclusion**

341 The incidence of HAIs was relatively high in the three hospitals in Bobo Dioulasso. The pathogens  
342 identified in these infections were mainly Enterobacteria, with more than one-third being EBLS.  
343 Risk factors for HAI included prolonged stay, male sex, neonatal or ICU admission. This study  
344 underlines the need to implement a policy for the prevention and control of these infections,  
345 focusing on the training of healthcare personnel, surveillance of HAIs and the development of  
346 therapeutic protocols for the rational use of antibiotics.

347

#### 348 **DECLARATIONS**

##### 349 **Ethics approval and consent to participate**

350 The study was approved by the National Health Ethics Committee of Burkina Faso. An information  
351 sheet was given to each participant. After reading this information sheet, those who desired to  
352 participate in the study signed a free and informed consent form. The data collected were  
353 anonymized to ensure their confidentiality.

##### 354 **Data availability**

355 The datasets, including deidentified provider quantitative and qualitative data, used and/or  
356 analyzed during the current study are available from the corresponding author upon reasonable  
357 request.

##### 358 **Competing interests**

359 AH, SAS, OK, SS, AP, ZCM, ASO and LS have no competing interests to declare.

##### 360 **Funding**

361 No external funding was provided for this project. The costs of collecting data were borne by a  
362 group of researchers from Sourô Sanou Teaching Hospital and Centre Muraz.

363 **Acknowledgments:** We would like to thank the data collectors, the staff of Sourô Sanou Teaching  
364 Hospital, Do and Dafra District Hospitals. Our gratitude extends to the patients for their  
365 participation in this study.

366

## 367 **References**

- 368 1. World Health Organization. Guidelines on Core Components of Infection Prevention and Control  
369 Programmes at the National and Acute Health Care Facility Level [Internet]. [cited 2024 May 23].  
370 Available from: <https://www.who.int/fr/publications-detail/9789241549929>
  
- 371 2. World Health Organization. Report on the Burden of Endemic Health Care-Associated  
372 Infection Worldwide [Internet]. [cited 2024 Jun 3]. Available from:  
373 [https://www.who.int/publications/i/item/report-on-the-burden-of-endemic-health-care-](https://www.who.int/publications/i/item/report-on-the-burden-of-endemic-health-care-associated-infection-worldwide)  
374 [associated-infection-worldwide](https://www.who.int/publications/i/item/report-on-the-burden-of-endemic-health-care-associated-infection-worldwide)
  
- 375 3. Baylina P, Moreira P. Challenging healthcare-associated infections: a review of healthcare  
376 quality management issues. *Journal of Management & Marketing in Healthcare*. 2013 Jul  
377 18;4(4):254–64.
  
- 378 4. Lakoh S, Li L, Sevalie S, Guo X, Adekanmbi O, Yang G, et al. Antibiotic resistance in  
379 patients with clinical features of healthcare-associated infections in an urban tertiary hospital  
380 in Sierra Leone: a cross-sectional study. *Antimicrobial Resistance & Infection Control*  
381 [Internet]. 2020 Feb 22 [cited 2024 May 21];9(1). Available from:  
382 <https://aricjournal.biomedcentral.com/articles/10.1186/s13756-020-0701-5>
  
- 383 5. Loaiza WM, Ruiz AKR, Patiño CCO, Vivas MC. Bacterial Resistance in Hospital-Acquired  
384 Infections Acquired in the Intensive Care Unit: A Systematic Review. *Acta Medica (Hradec*  
385 *Kralove, Czech Republic)*. 2023;66(1):1–10.
  
- 386 6. Irek EO, Amupitan AA, Obadare TO, Aboderin AO. A systematic review of healthcare-  
387 associated infections in Africa: An antimicrobial resistance perspective. *African Journal of*  
388 *Laboratory Medicine* [Internet]. 2018 Dec 6 [cited 2024 May 20];7(2). Available from:  
389 <http://www.ajlmonline.org/index.php/AJLM/article/view/796>
  
- 390 7. World Health Organization. WHO guidelines on hand hygiene in health care [Internet]. [cited  
391 2024 Jun 3]. Available from: <https://www.who.int/publications/i/item/9789241597906>
  
- 392 8. McMillan S. Preventing healthcare-associated infections by decontaminating the clinical  
393 environment. *Nursing Standard*. 2022 Apr 28;37(5):61–6.
  
- 394 9. Allegranzi B, Nejad SB, Combescure C, Graafmans W, Attar H, Donaldson L, et al. Burden  
395 of endemic health-care-associated infection in developing countries: systematic review and  
396 meta-analysis. *The Lancet*. 2011 Jan;377(9761):228–41.
  
- 397 10. Abubakar U, Amir O, Rodríguez-Baño J. Healthcare-associated infections in Africa: a

- 398 systematic review and meta-analysis of point prevalence studies. *Journal of Pharmaceutical*  
399 *Policy and Practice* [Internet]. 2022 Dec 9 [cited 2024 May 20];15(1). Available from:  
400 <https://joppp.biomedcentral.com/articles/10.1186/s40545-022-00500-5>
- 401 11. Mpinda-Joseph P, Anand Paramadhas BD, Reyes G, Maruatona MB, Chise M, Monokwane-  
402 Thupiso BB, et al. Healthcare-associated infections including neonatal bloodstream infections  
403 in a leading tertiary hospital in Botswana. *Hospital Practice*. 2019 Aug 27;47(4):203–10.
- 404 12. Alemu AY, Endalamaw A, Belay DM, Mekonen DK, Birhan BM, Bayih WA. Healthcare-  
405 associated infection and its determinants in Ethiopia: A systematic review and meta-analysis.  
406 Torpey K, editor. *PLOS ONE*. 2020 Oct 23;15(10):e0241073.
- 407 13. Afle FCD, Quenum KJMK, Hessou S, Johnson RC. Assessment of healthcare-associated  
408 infections in two public hospitals in southern Benin (West Africa): Centre Hospitalier  
409 Universitaire de Zone d'Abomey- Calavi/Sô-Ava and Centre Hospitalier de Zone de Cotonou  
410 5. *Journal of Applied Biosciences*. 2018 Mar 26;121(1):12192.
- 411 14. Nasiri N, Sharifi A, Ghasemzadeh I, Khalili M, Karamoozian A, Khalooei A, et al. Incidence,  
412 accuracy, and barriers of diagnosing healthcare-associated infections: a case study in  
413 southeast Iran. *BMC Infectious Diseases* [Internet]. 2023 Mar 21;23(1). Available from:  
414 <https://bmcinfectdis.biomedcentral.com/articles/10.1186/s12879-023-08122-1>
- 415 15. Hien H, Darbo KM, Ouédraogo L, Konfé S, Zeba S, Sangaré L, et al. Healthcare-associated  
416 infection in Burkina Faso: an assessment in a district hospital. *Journal of Public Health in*  
417 *Africa*. 2012 Dec 18;3(2):29.
- 418 16. Some MG. prevalence of care-associated infections and anti-infection treatments in Bobo-  
419 Dioulasso public hospitals [internet] [medical thesis]. [Bobo Dioulasso, Burkina Faso]:  
420 university Nazi Boni; 2018 [cited 2024 may 28]. Available from: [https://bibliovirtuelle.u-](https://bibliovirtuelle.unaziboni.bf/biblio/opac_css/docnume/inssa/medcineinfos/INSSA-2018-SOM-PRE.pdf)  
421 [naziboni.bf/biblio/opac\\_css/docnume/inssa/medcineinfos/INSSA-2018-SOM-PRE.pdf](https://bibliovirtuelle.unaziboni.bf/biblio/opac_css/docnume/inssa/medcineinfos/INSSA-2018-SOM-PRE.pdf)
- 422 17. Technical Committee on nosocomial infections and healthcare-associated infections. Update  
423 of the definition of nosocomial infections [Internet]. 2006 [cited 2024 Jun 3]. Available from:  
424 [https://sante.gouv.fr/IMG/pdf/rapport\\_complet.pdf](https://sante.gouv.fr/IMG/pdf/rapport_complet.pdf)
- 425 18. Ali S, Birhane M, Bekele S, Kibru G, Teshager L, Yilma Y, et al. Healthcare associated  
426 infection and its risk factors among patients admitted to a tertiary hospital in Ethiopia:  
427 longitudinal study. *Antimicrobial Resistance & Infection Control* [Internet]. 2018 Jan 5 [cited  
428 2024 May 20];7(1). Available from: <https://aricjournal.biomedcentral.com/articles/>

- 429 [10.1186/s13756-017-0298-5](https://doi.org/10.1186/s13756-017-0298-5)
- 430 19. Merzougui L, Barhoumi T, Guizani T, Barhoumi H, Hannachi H, Turki E, et al. Nosocomial  
431 infections in the intensive care setting: annual incidence and clinical aspects in the  
432 Multipurpose Intensive Care Unit, Kairouan, Tunisia, 2014. Pan African Medical Journal  
433 [Internet]. 2018 [cited 2024 May 22];30. Available from: [http://www.panafrican-med-](http://www.panafrican-med-journal.com/content/article/30/143/full/)  
434 [journal.com/content/article/30/143/full/](http://www.panafrican-med-journal.com/content/article/30/143/full/)
- 435 20. Bukasa JC, Muteba P, Kazadi A, Lepelletier D, Ilunga F, Mutombo A, et al. Study of the  
436 incidence of nosocomial infections and risk factors in maternity units in the town of  
437 Mbuji-Mayi, Democratic Republic of Congo. Pan African Medical Journal [Internet]. 2021  
438 [cited 2024 May 21];38. Available from: [https://www.panafrican-med-](https://www.panafrican-med-journal.com/content/article/38/95/full)  
439 [journal.com/content/article/38/95/full](https://www.panafrican-med-journal.com/content/article/38/95/full)
- 440 21. Nejad SB, Allegranzi B, Syed S, Ellis B, Pittet D. Health-care associated infection in Africa.  
441 BMC Proceedings [Internet]. 2011 Jun 29 [cited 2024 May 22];5(S6). Available from:  
442 <https://bmcproc.biomedcentral.com/articles/10.1186/1753-6561-5-S6-O14>
- 443 22. Raoofi S, Pashazadeh Kan F, Rafiei S, Hosseinipalangi Z, Noorani Mejareh Z, Khani S, et al.  
444 Global prevalence of nosocomial infection: A systematic review and meta-analysis. Kuo Y-  
445 H, editor. PLOS ONE. 2023 Jan 27;18(1):e0274248.
- 446 23. Canadian Nosocomial Infection Surveillance Program. Device and surgical procedure-related  
447 infections in Canadian acute care hospitals from 2011 to 2020. Canada Communicable  
448 Disease Report. 2022 Aug 8;48(7/8):325–39.
- 449 24. Olivier C, Kunneke H, O’Connell N, Delft E von, Wates M, Dramowski A. Healthcare-  
450 associated infections in paediatric and neonatal wards: A point prevalence survey at four  
451 South African hospitals. South African Medical Journal. 2018 Apr 25;108(5):418–22.
- 452 25. Chernet AZ, Dasta K, Belachew F, Zewdu B, Melese M, Ali MM. Burden of Healthcare-  
453 Associated Infections and Associated Risk Factors at Adama Hospital Medical College,  
454 Adama, Oromia, Ethiopia. Drug, Healthcare and Patient Safety. 2020 Oct;Volume 12:177–  
455 85.
- 456 26. Lanini S, Jarvis WR, Nicastrì E, Privitera G, Gesu G, Marchetti F, et al. Healthcare-  
457 Associated Infection in Italy Annual Point-Prevalence Surveys, 2002–2004. Infection Control  
458 & Hospital Epidemiology. 2015 Jan 2;30(7):659–65.
- 459 27. Ezzi O, Majoub M, Ammar A, Dhaouad N, Ayedi Y, Helali Radhia, et al. Burden of

- 460 Healthcare-associated infections in a Tunisian University Hospital in 2019 - PubMed  
461 [Internet]. [cited 2024 Jun 3]. Available from: <https://pubmed.ncbi.nlm.nih.gov/35288921/>
- 462 28. Kotb S, Lyman M, Ismail G, Abd El Fattah M, Girgis SA, Etman A, et al. Epidemiology of  
463 Carbapenem-resistant Enterobacteriaceae in Egyptian intensive care units using National  
464 Healthcare-associated Infections Surveillance Data, 2011–2017. *Antimicrobial Resistance &*  
465 *Infection Control* [Internet]. 2020 Jan 3 [cited 2024 May 21];9(1). Available from:  
466 <https://aricjournal.biomedcentral.com/articles/10.1186/s13756-019-0639-7>
- 467 29. Rimaz S, Tajzadeh P, Bahrami M, Nooghabi M, Eshrati B, Effati S, et al. Epidemiological  
468 features, antimicrobial resistance profile and clinical outcomes of healthcare-associated  
469 infections in Islamic Republic of Iran. *Eastern Mediterranean Health Journal*. 2023 Sep  
470 18;29(9):688–98.
- 471 30. Ketata N, Ben Ayed H, Ben Hmida M, Trigui M, Ben Jemaa M, Yaich S, et al. Point  
472 prevalence survey of health-care associated infections and their risk factors in the tertiary-  
473 care referral hospitals of Southern Tunisia. *Infection, Disease & Health*. 2021 Nov;26(4):284–  
474 91.

475 **Supporting information**

476 **S1\_Figure 1:** Distribution of healthcare-associated infection(n=166), multicenter longitudinal  
477 survey, Bobo-Dioulasso 2022

478 **S2\_Figure 2:** Groups of microorganisms (n=47), multicenter longitudinal survey, Bobo-Dioulasso  
479 2022

480 **S1\_Table 1:** Characteristics of patients, multicenter longitudinal survey, Bobo-Dioulasso 2022

481 **S2\_Table 2:** Incidence of healthcare-associated infection by ward specialty, multicenter  
482 longitudinal survey, Bobo-Dioulasso, 2022

483 **S3\_Table 3:** Healthcare-associated infection risk factor, multicenter longitudinal survey, Bobo-  
484 Dioulasso, 2022

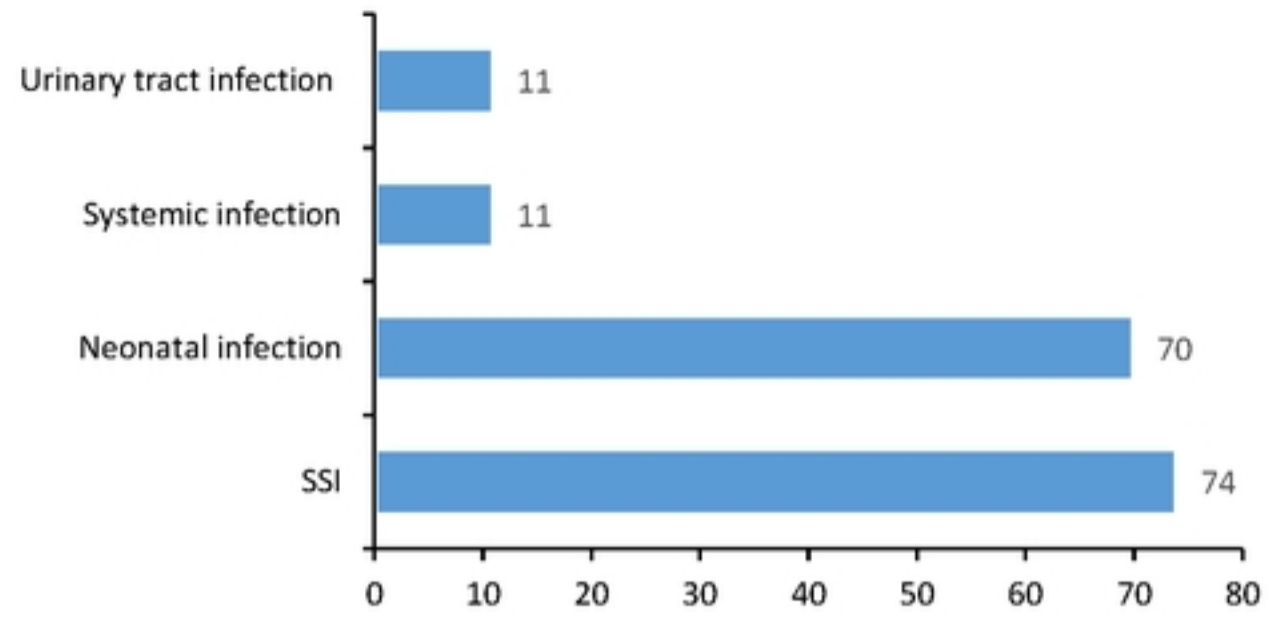

**Figure1:** Distribution of healthcare-associated infection(n=166), multicenter longitudinal survey, Bobo-Dioulasso 2022

medRxiv preprint doi: <https://doi.org/10.1101/2024.07.04.24309979>; this version posted July 5, 2024. The copyright holder for this preprint (which was not certified by peer review) is the author/funder, who has granted medRxiv a license to display the preprint in perpetuity. It is made available under a [CC-BY 4.0 International license](https://creativecommons.org/licenses/by/4.0/).



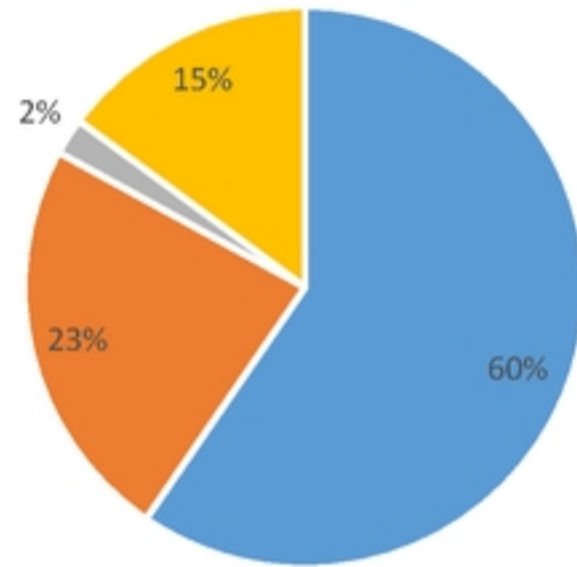

medRxiv preprint doi: <https://doi.org/10.1101/2024.07.04.24309979>; this version posted July 5, 2024. The copyright holder for this preprint (which was not certified by peer review) is the author/funder, who has granted medRxiv a license to display the preprint in perpetuity. It is made available under a [CC-BY 4.0 International license](#).

■ Enterobacteriaceae ■ gram negatif bacilli ■ Fungi ■ Gram positive cocci

**Figure 2:** Groups of microorganisms (n=47), multicenter longitudinal survey, Bobo-Dioulasso 2022
